# Supplementary material
Source: Springer Nature journal article supplement (https://www.springermedizin.de/resource/supplementary/12986_2007_114_MOESM7_ESM.pdf/25655390)

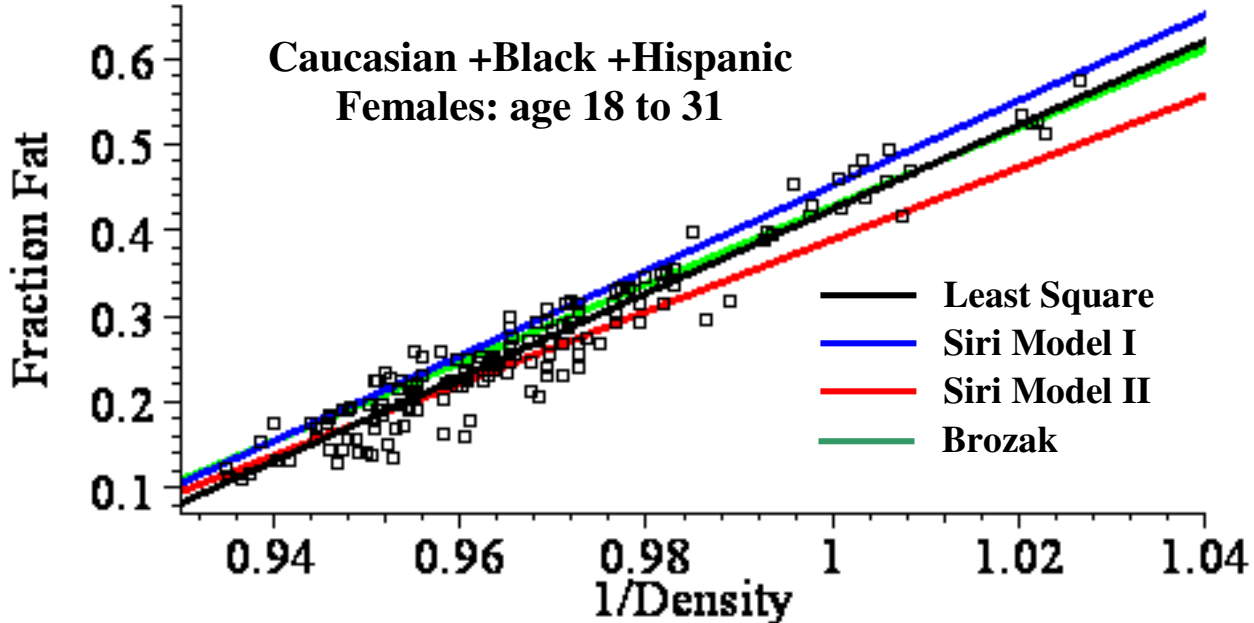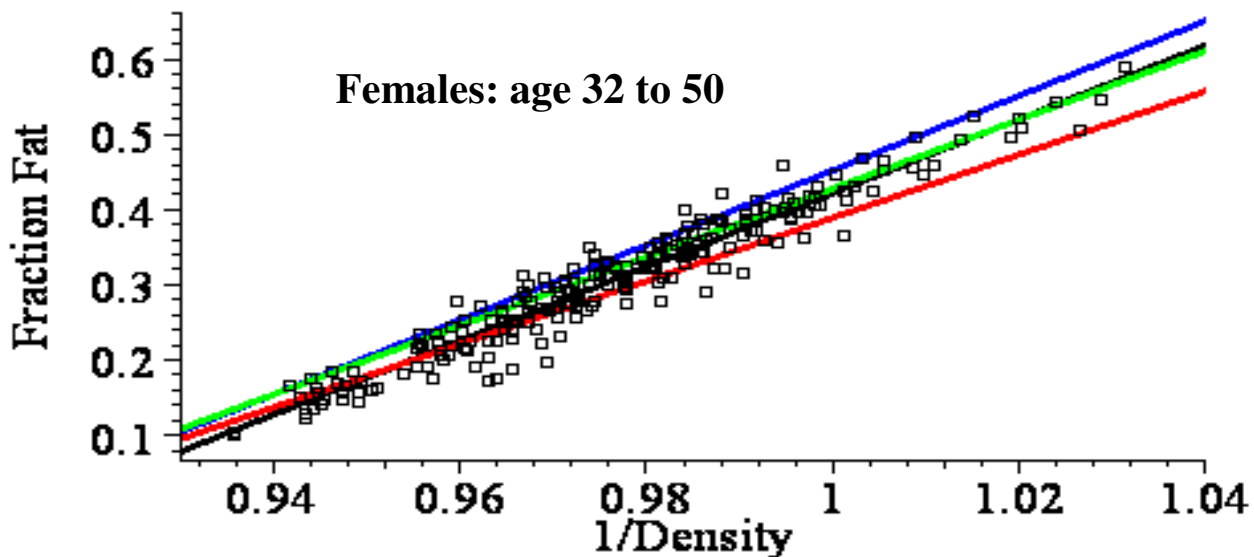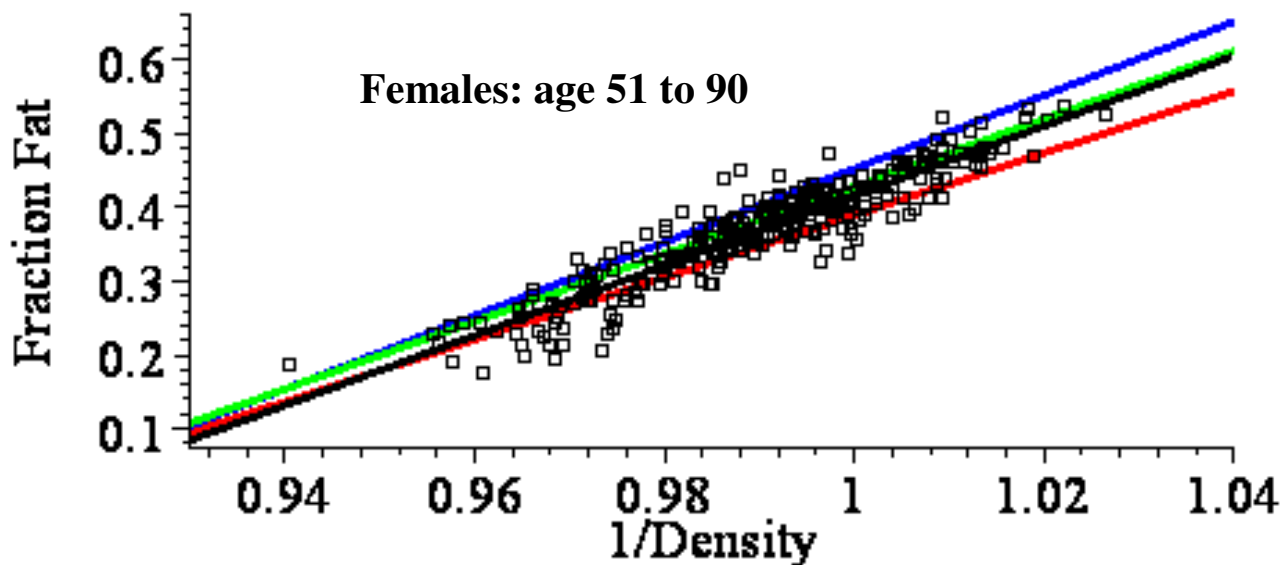

Supplement: MOESM7 [file 25655390]
